# Supplementary material for: F and rare V4+doped cobalt hydroxide hybrid nanostructures: excellent OER activity with ultralow overpotential
Source: Royal Society of Chemistry journal article supplement (doi:10.1039/d3dt00547j), 2023-01-01
Supplement: d3dt00547j1.pdf [file d3dt00547j1.pdf]

**F and rare V<sup>4+</sup> doped cobalt hydroxide hybrid nanostructures: Excellent OER activity  
with ultralow overpotential**

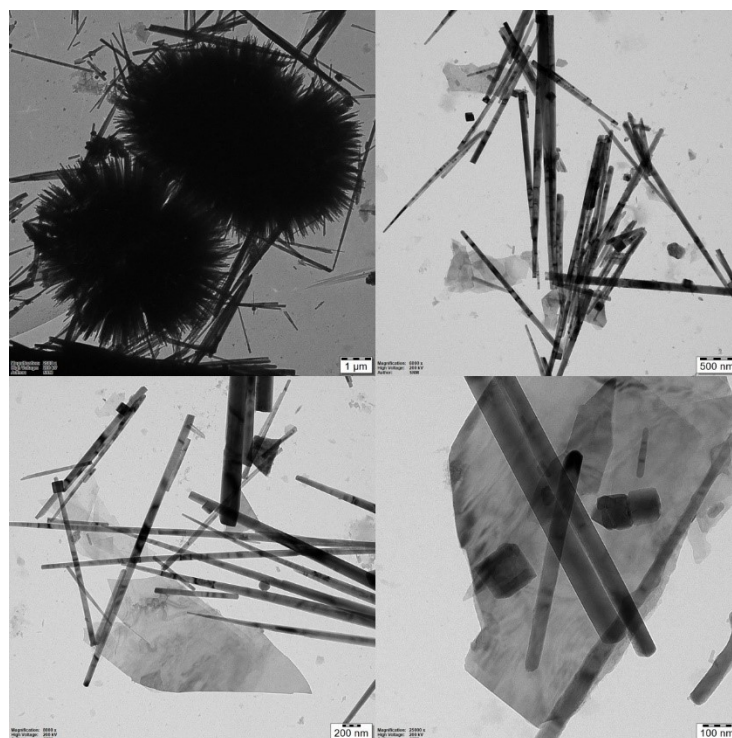

Figure S1. HR-TEM images of Co(OH)<sub>2</sub>.

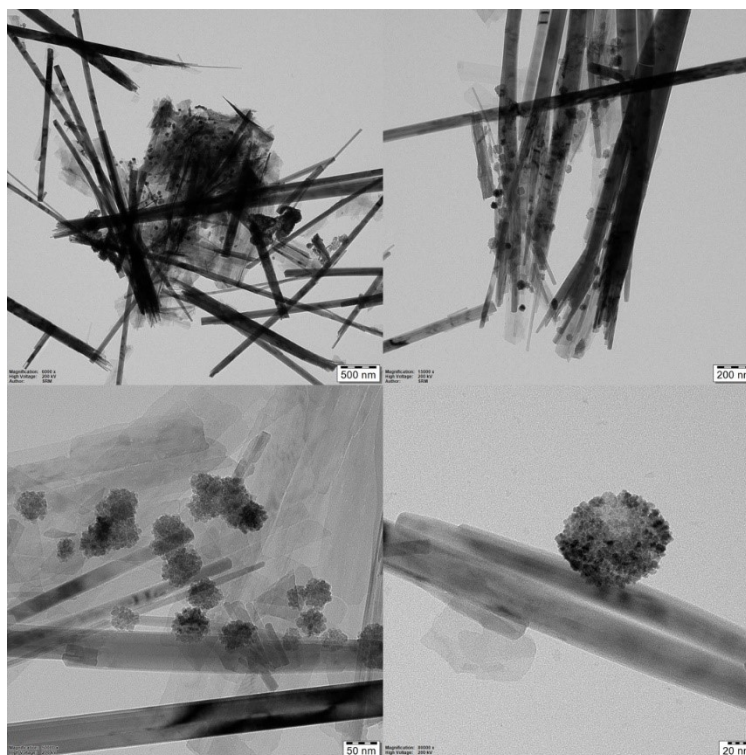

Figure S2. HR-TEM images of V-Co(OH)<sub>2</sub>.

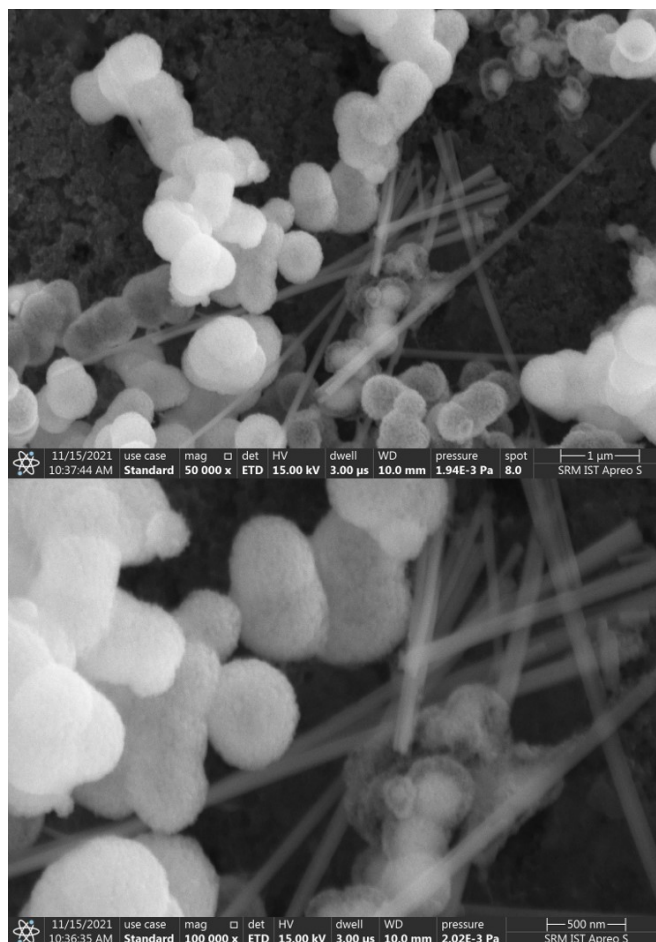

Figure S3. FE-SEM images of V-Co(OH)<sub>2</sub>.

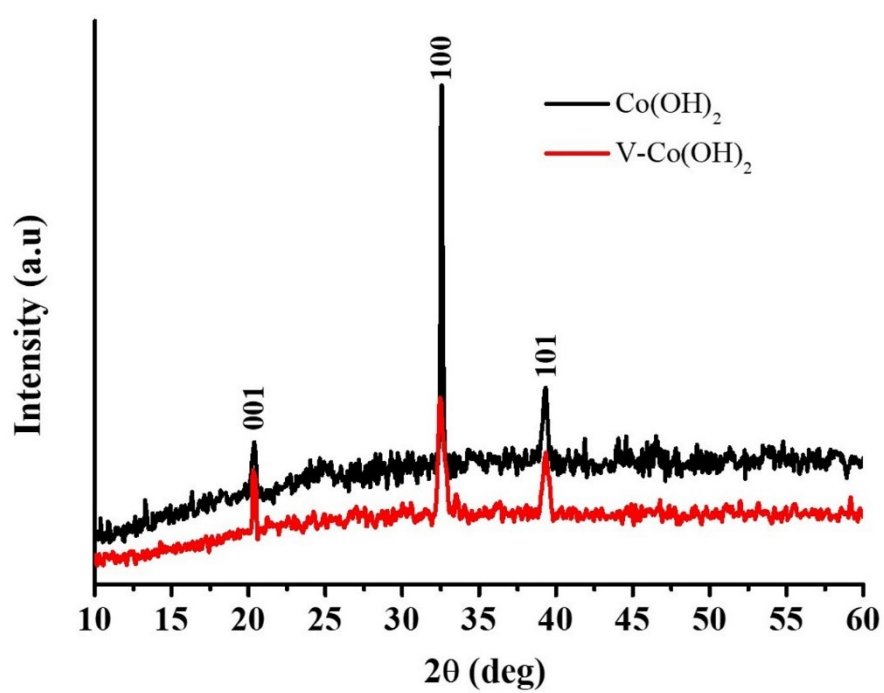

Figure S4. PXRD patterns of Co(OH)<sub>2</sub> and V-Co(OH)<sub>2</sub>.

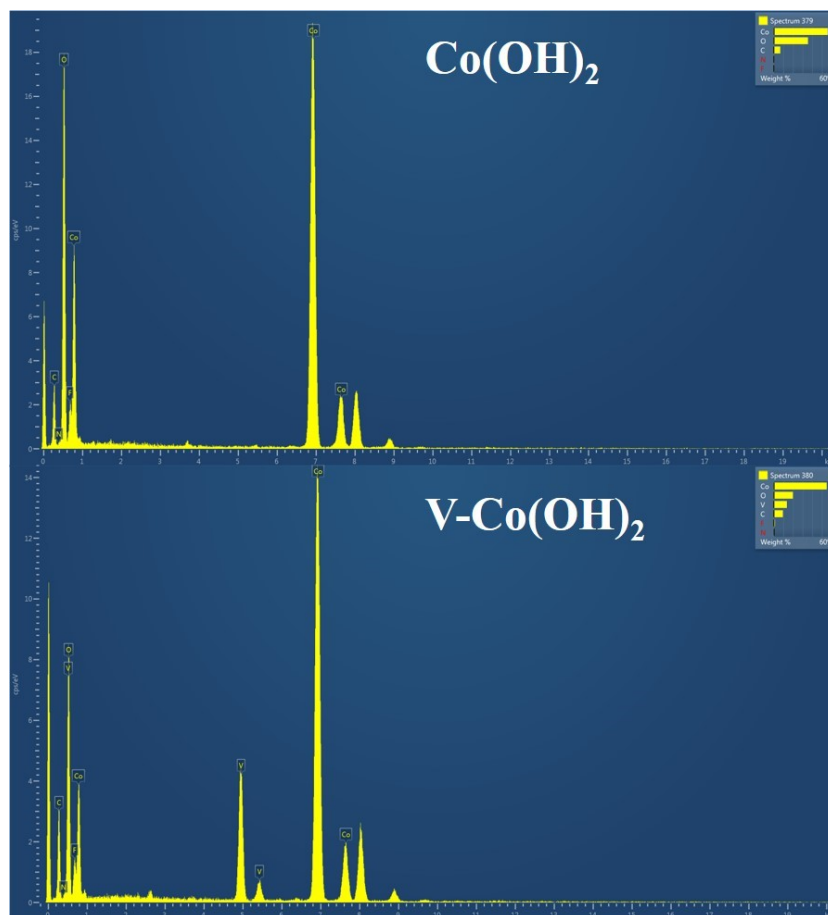

Figure S5. EDX graph of  $\text{Co(OH)}_2$  and  $\text{V-Co(OH)}_2$ .

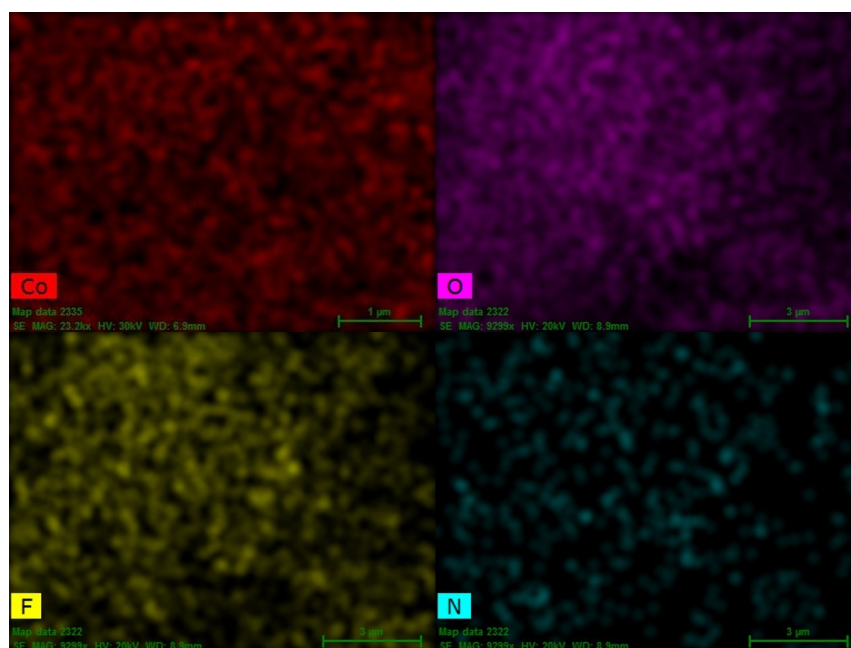

Figure S6. Elemental mapping of  $\text{Co(OH)}_2$ .

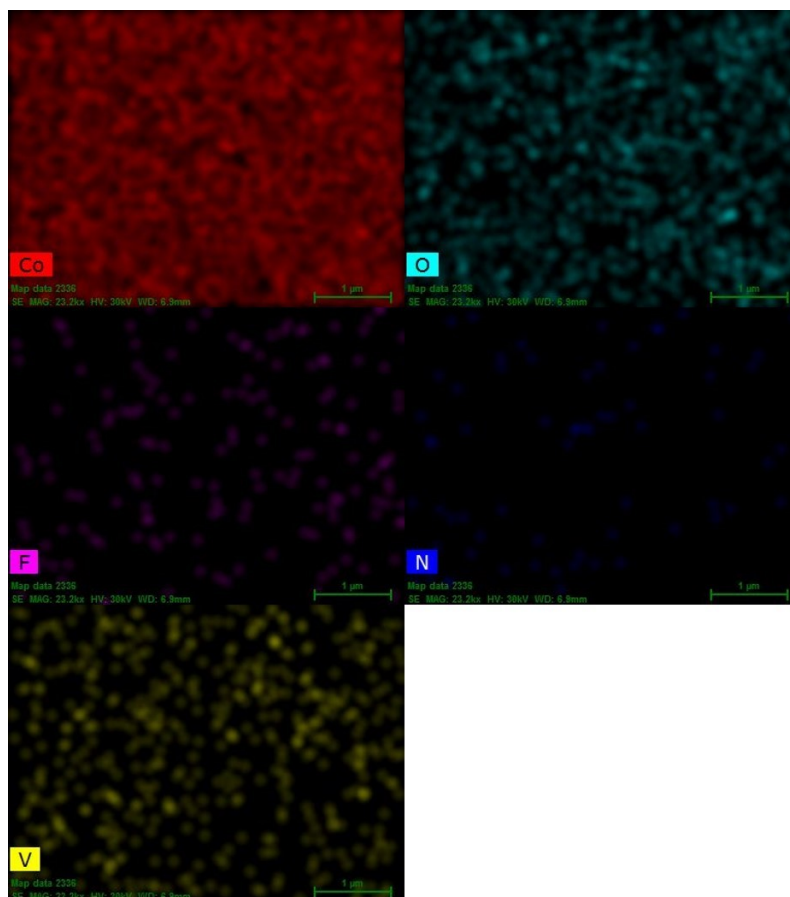

Figure S7. Elemental mapping of V-Co(OH)<sub>2</sub>.

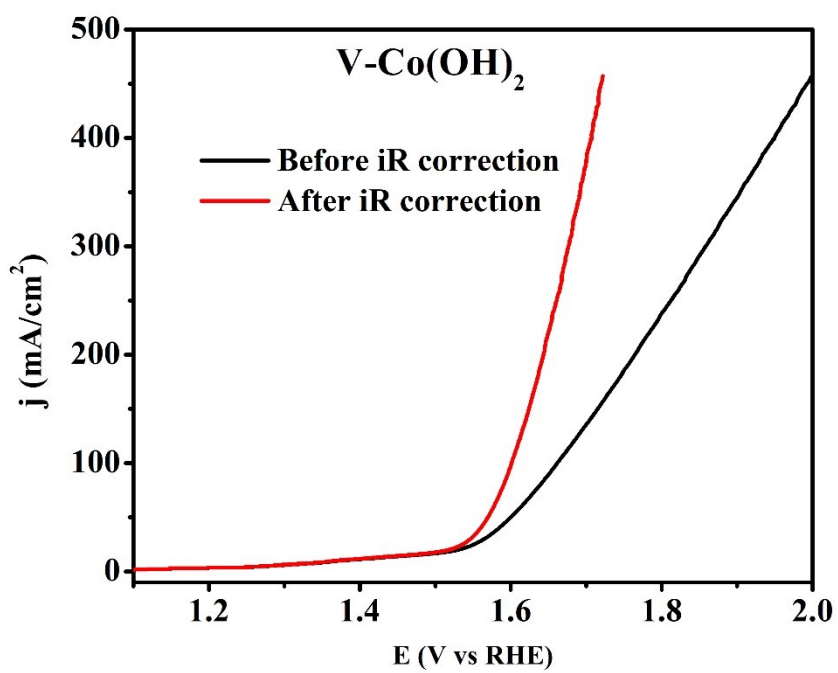

Figure S8. OER polarization curves of V-Co(OH)<sub>2</sub> before and after iR correction.

Table S1- Comparison table to comparing the OER activity of V-Co(OH)<sub>2</sub> with recently reported catalysts.

| Catalyst                                            | Overpotential at 10 mA cm <sup>-2</sup> (mV) | Tafel Slope (mV/dec) | Reference       |
|-----------------------------------------------------|----------------------------------------------|----------------------|-----------------|
| <b>V-Co(OH)<sub>2</sub></b>                         | <b>136</b>                                   | <b>47.2</b>          | <b>Our work</b> |
| V-doped CoP                                         | 254                                          | 35                   | 1               |
| V-Doped Co <sub>3</sub> O <sub>4</sub>              | 293.6                                        | 53.3                 | 2               |
| CoFeV LDH/NF                                        | 242                                          | 57                   | 3               |
| V-Ni <sub>3</sub> S <sub>2</sub> /CC                | 180                                          | 56                   | 4               |
| CoVOOH                                              | 190                                          | 39.6                 | 5               |
| CoV-HNNs                                            | 268                                          | 80                   | 6               |
| CoFeV LDH                                           | 242                                          | 41.4                 | 7               |
| NiFeV LDHs                                          | 195 (20 j)                                   | 42                   | 8               |
| V-Co/CoO@C                                          | 320                                          | 143                  | 9               |
| V-Ni <sub>3</sub> S <sub>2</sub>                    | 148                                          | 70                   | 10              |
| VO <sub>x</sub> /Ni <sub>3</sub> S <sub>2</sub> @NF | 358 (100 j)                                  | 82                   | 11              |
| V-doped CoP                                         | 340                                          | 95.7                 | 12              |
| Ru/CoFe LDH                                         | 198                                          | 39                   | 13              |
| V <sup>3+</sup> -β-Co(OH) <sub>2</sub>              | 198                                          | 60                   | 14              |
| CoVP@CC                                             | 290                                          | 55.9                 | 15              |
| V-NiFe-LDH/NF                                       | 195                                          | 31.3                 | 16              |
| V-Ni <sub>3</sub> S <sub>2</sub> @NiO/NF            | 170                                          | 98.8                 | 17              |
| Ni <sub>1</sub> V <sub>1</sub> P<br>NSs/NF          | 250 (50 j)                                   | 80                   | 18              |
| Ru doped Co(OH) <sub>2</sub>                        | 305 (50 j)                                   | 64.8                 | 19              |
| Fe doped MOF CoV@CoO<br>nanoflakes                  | 220 (25j)                                    | 59                   | 20              |
| NiCoV-LDH                                           | 280                                          | 67                   | 21              |
| Co/VN                                               | 320                                          | 50.4                 | 22              |

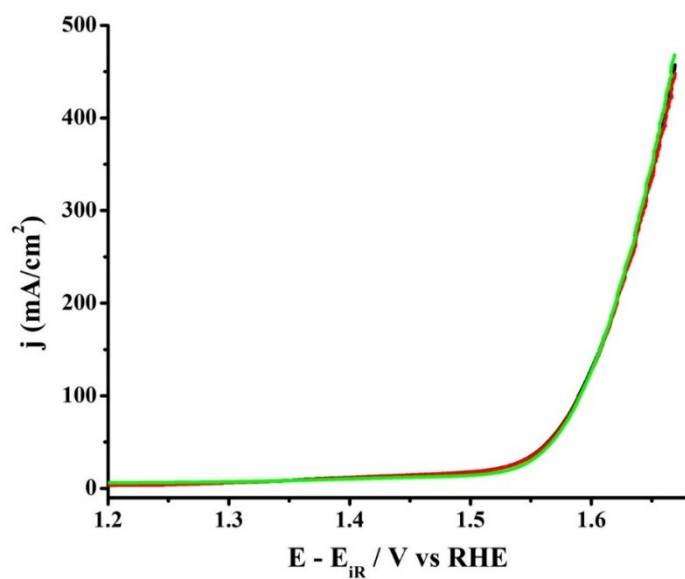

Figure S9. OER polarization curves of V-Co(OH)<sub>2</sub> fabricated at three different batches.

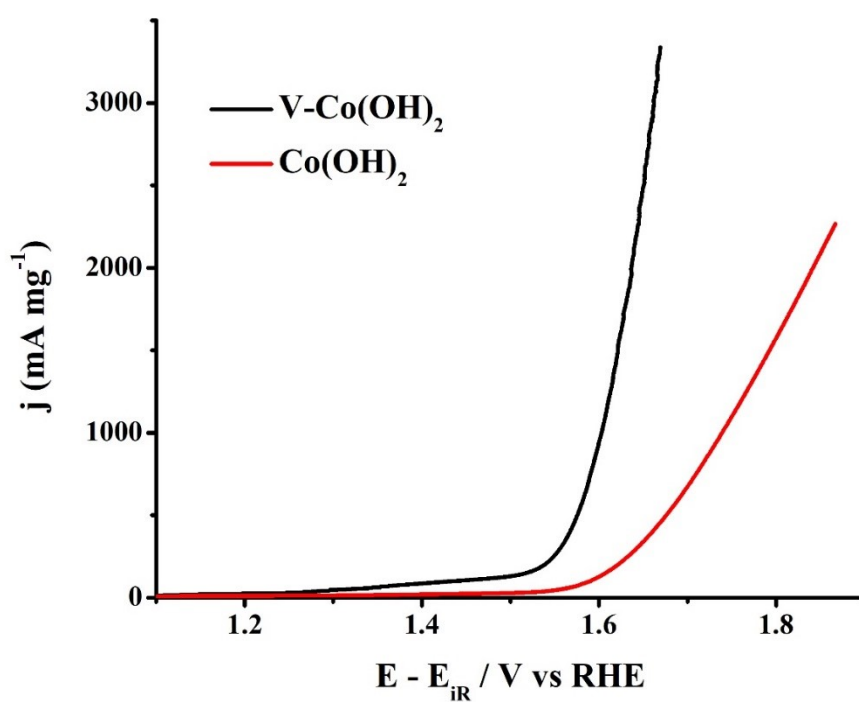

Figure S10. Mass activity of undoped Co(OH)<sub>2</sub> and V-Co(OH)<sub>2</sub> catalysts.

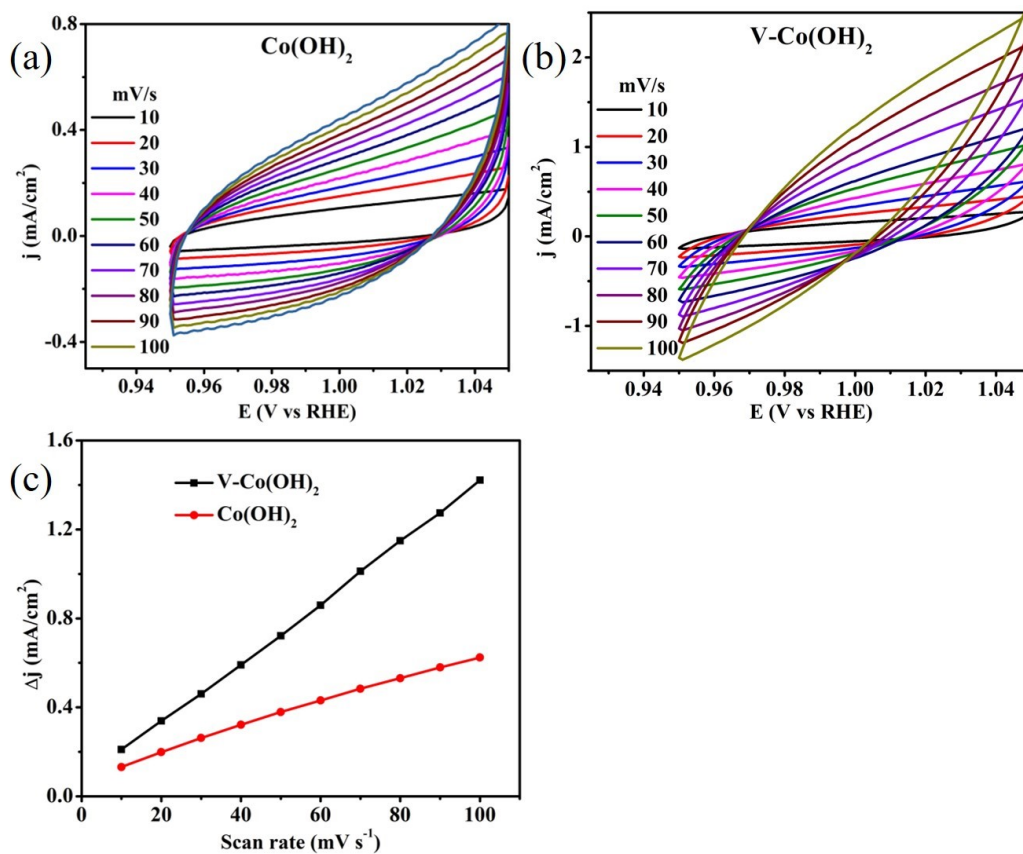

Figure S11. (a, b) Double layer capacitance and (c) capacitive currents as a functional of scan rate.

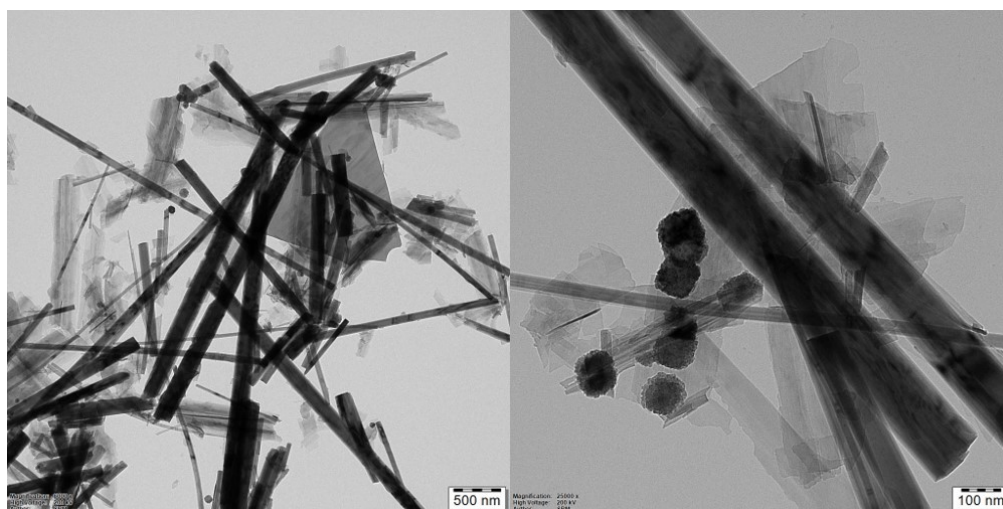

Figure S12. HR-TEM, SAED pattern and lattice fringe pattern images of  $\text{V-Co(OH)}_2\text{-8}$ .

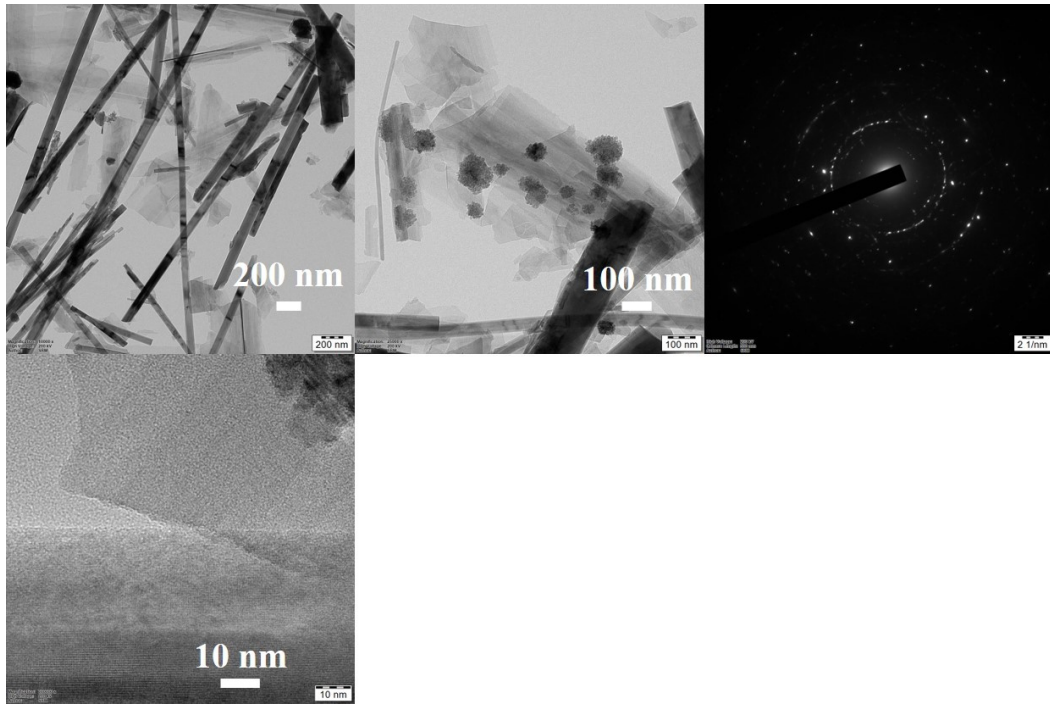

Figure S13. HR-TEM, SAED pattern and lattice fringe pattern images of V-Co(OH)<sub>2</sub>-12.

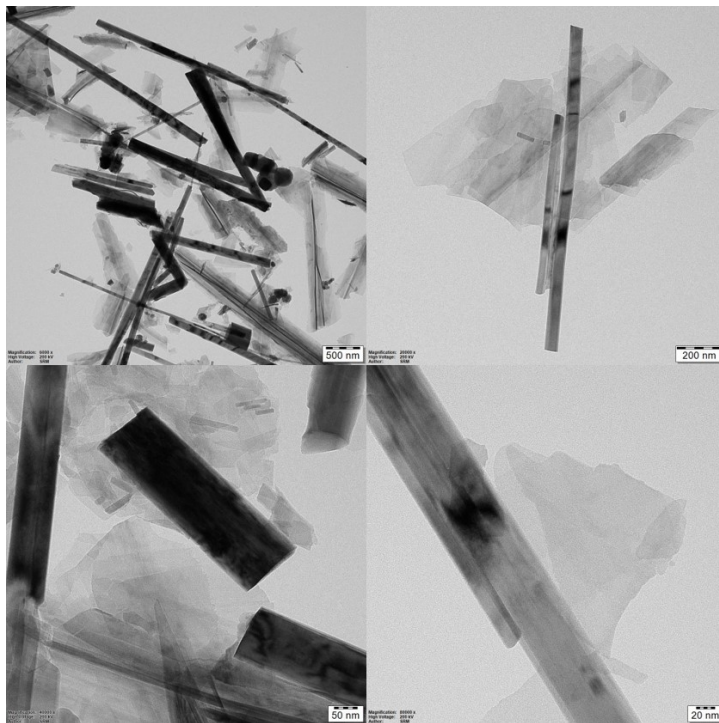

Figure S14. HR-TEM images of V-Co(OH)<sub>2</sub>-12 at various magnification.



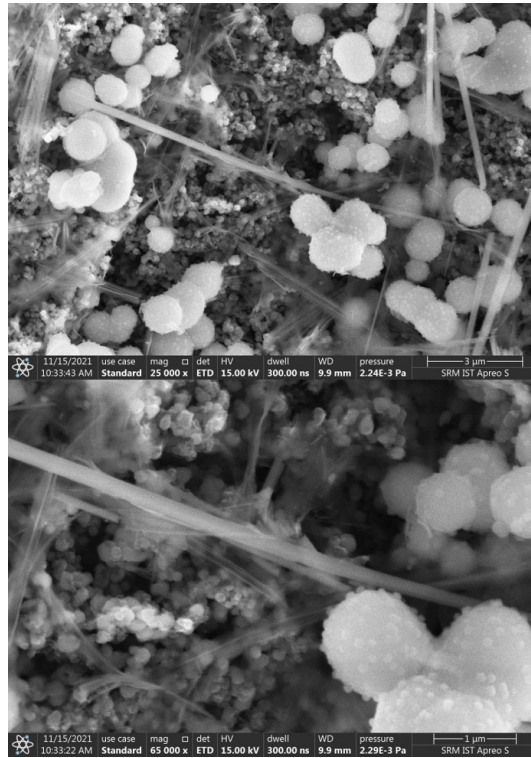

Figure S15. FE-SEM images of  $V-Co(OH)_2-8$ .

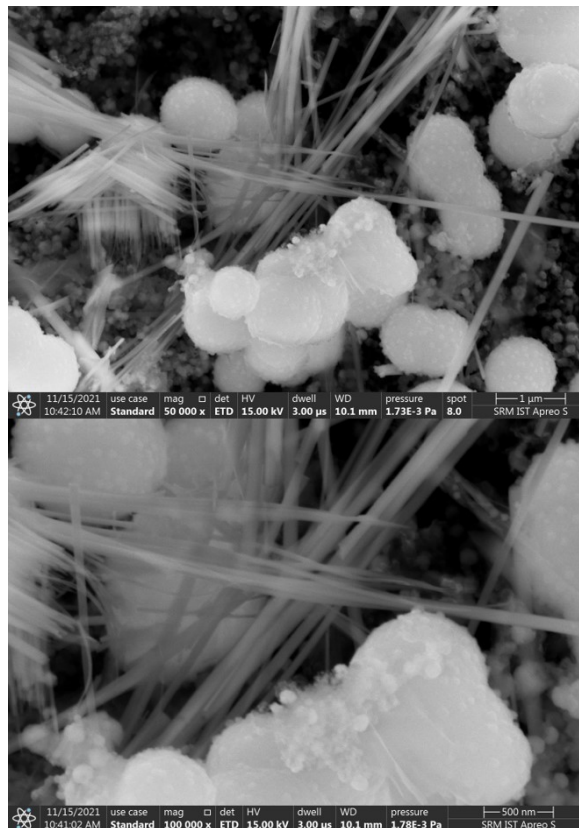

Figure S16. FE-SEM images of  $V-Co(OH)_2-12$ .

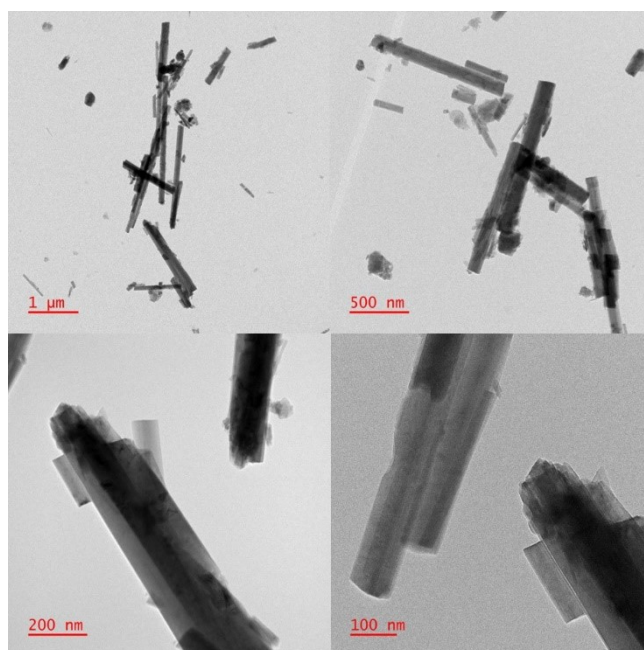

Figure S17. HR-TEM images of V-Co(OH)<sub>2</sub>-2h.

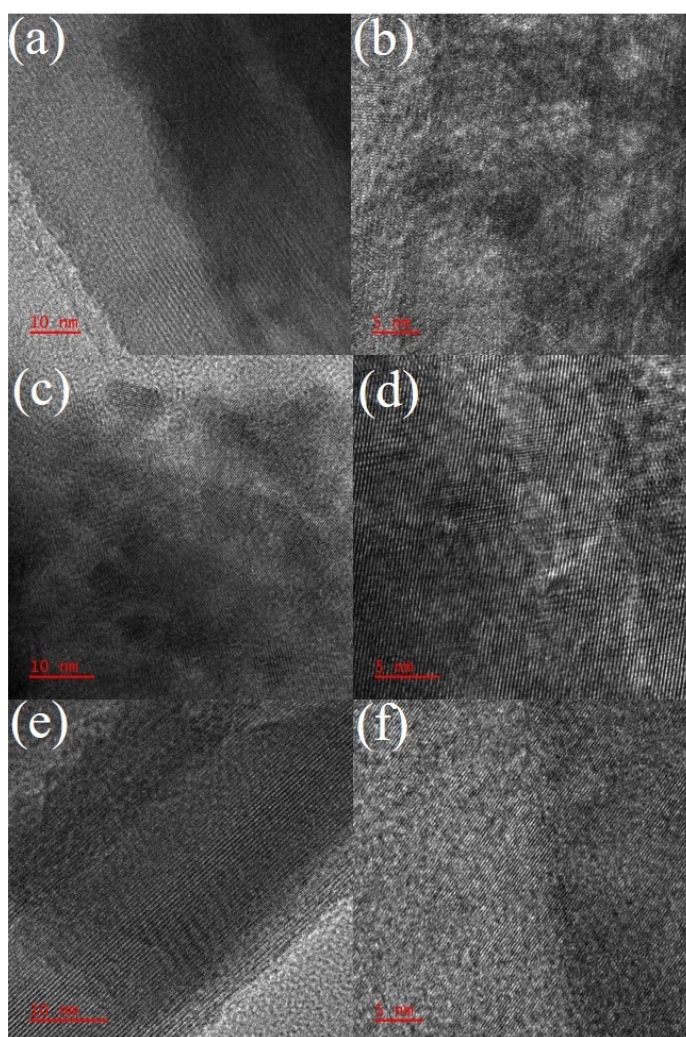

Figure 18. Lattice fringe pattern images of (a, b) V-Co(OH)<sub>2</sub>-2h, (c, d) V-Co(OH)<sub>2</sub>-4h and (e, f) V-Co(OH)<sub>2</sub> prepared without using NH<sub>4</sub>F.

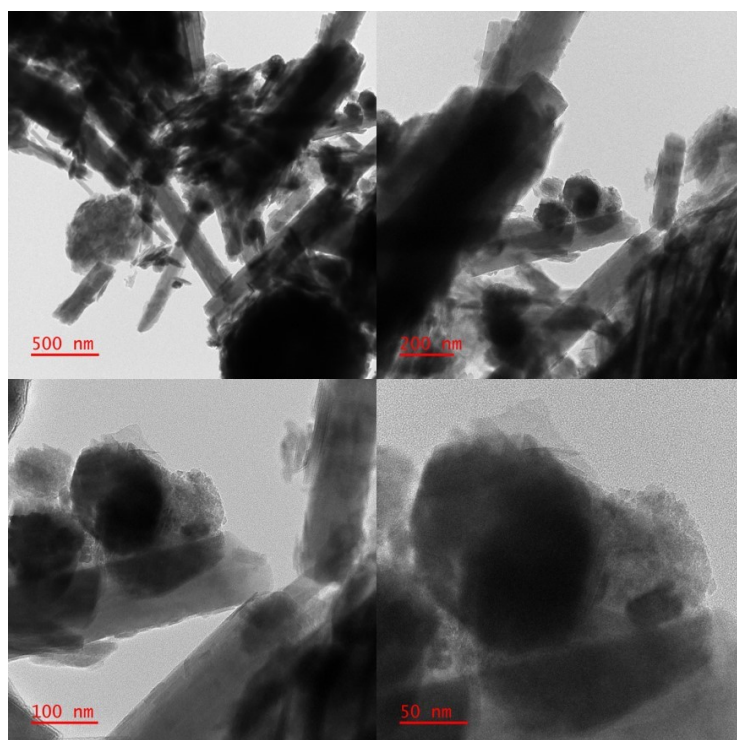

Figure S19. HR-TEM images of V-Co(OH)<sub>2</sub>-4h.

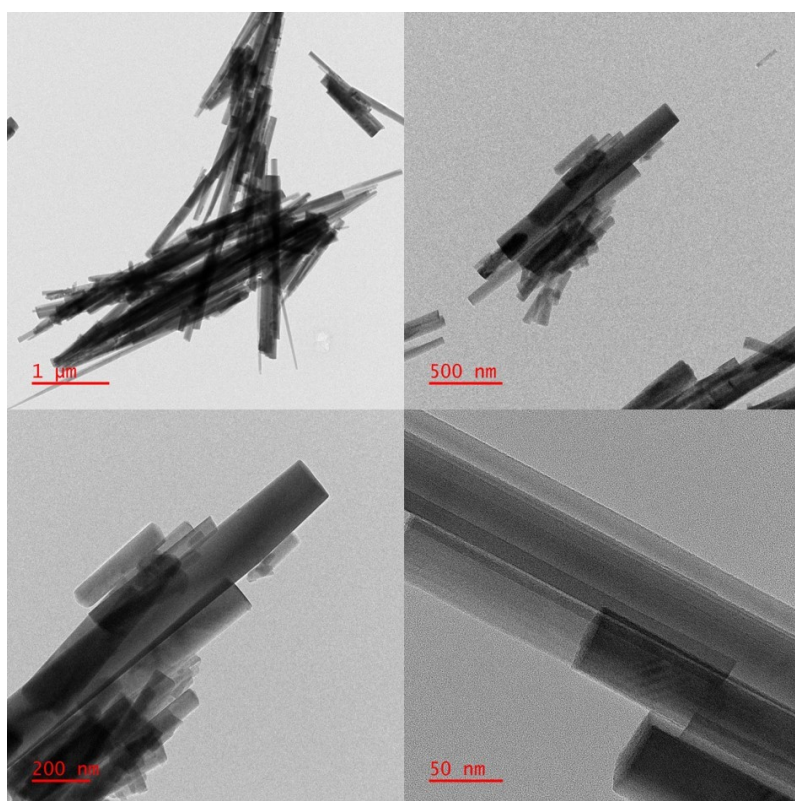

Figure S20. HR-TEM images of V-Co(OH)<sub>2</sub> without NH<sub>4</sub>F.

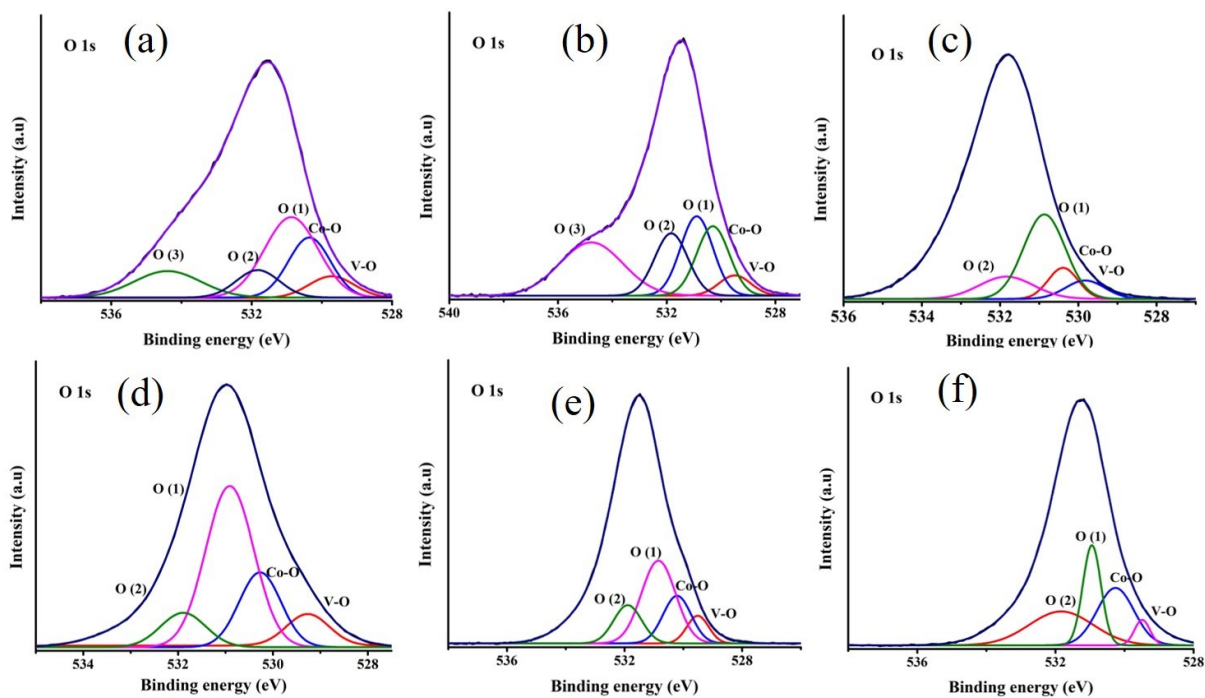

Figure S21. The high-resolution XPS spectra of O 1s in (a) V-Co(OH)<sub>2</sub>-8, (b) V-Co(OH)<sub>2</sub>-12, (c) V-Co(OH)<sub>2</sub>-2h, (d) V-Co(OH)<sub>2</sub>-4h, (e) V-Co(OH)<sub>2</sub> without NH<sub>4</sub>F and (f) V-Co(OH)<sub>2</sub> with NaF.

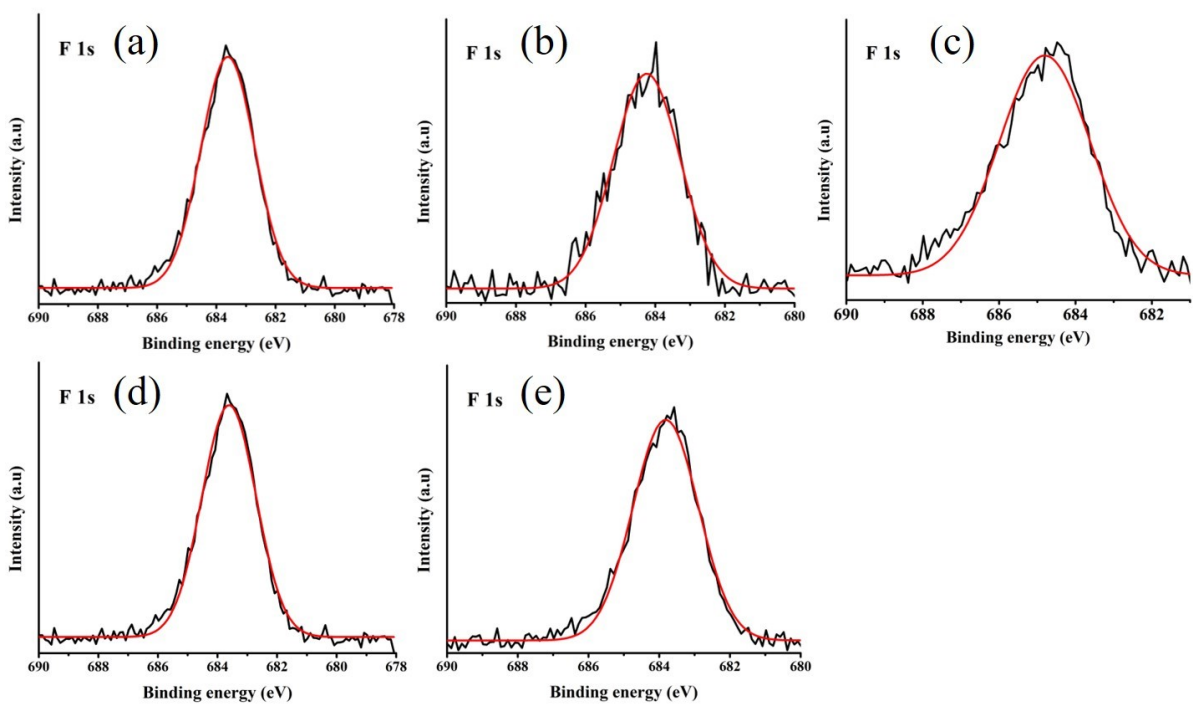

Figure S22. The high-resolution XPS spectra of F 1s in (a) V-Co(OH)<sub>2</sub>-8, (b) V-Co(OH)<sub>2</sub>-12, (c) V-Co(OH)<sub>2</sub>-2h, (d) V-Co(OH)<sub>2</sub>-4h, (e) with NaF.

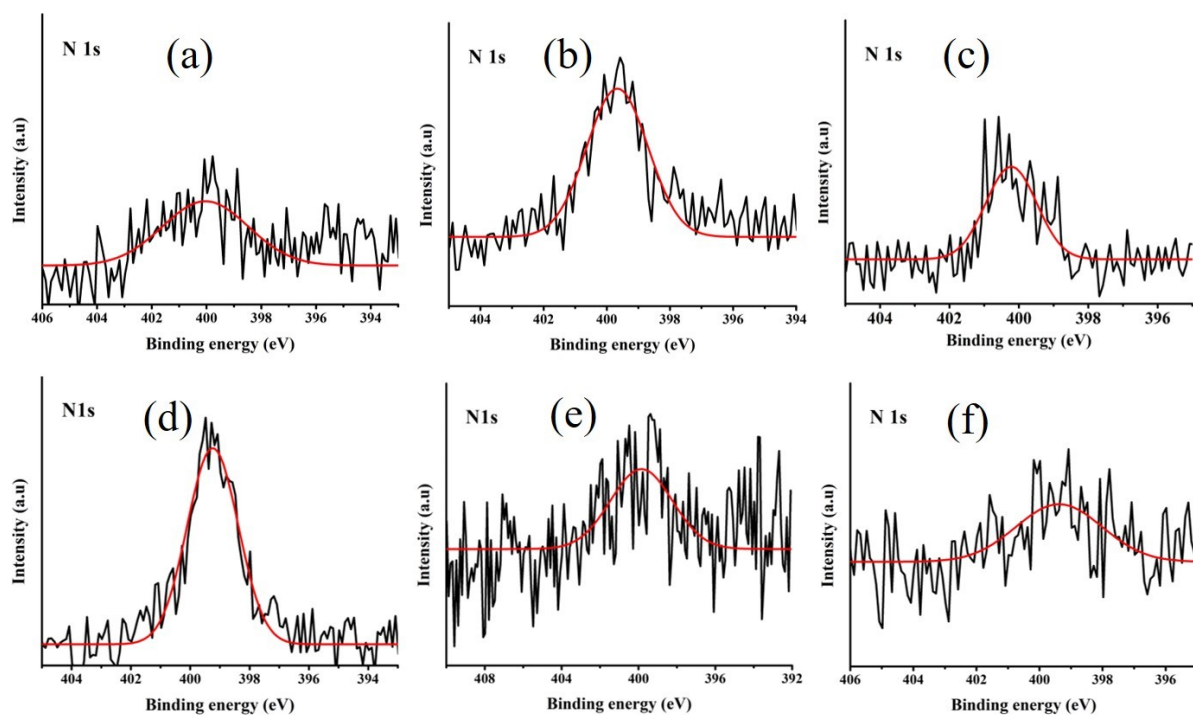

Figure S23. The high-resolution XPS spectra of N 1s in (a) V-Co(OH)<sub>2</sub>-8, (b) V-Co(OH)<sub>2</sub>-12, (c) V-Co(OH)<sub>2</sub>-2h, (d) V-Co(OH)<sub>2</sub>-4h, (e) V-Co(OH)<sub>2</sub> without NH<sub>4</sub>F and (f) V-Co(OH)<sub>2</sub> with NaF.

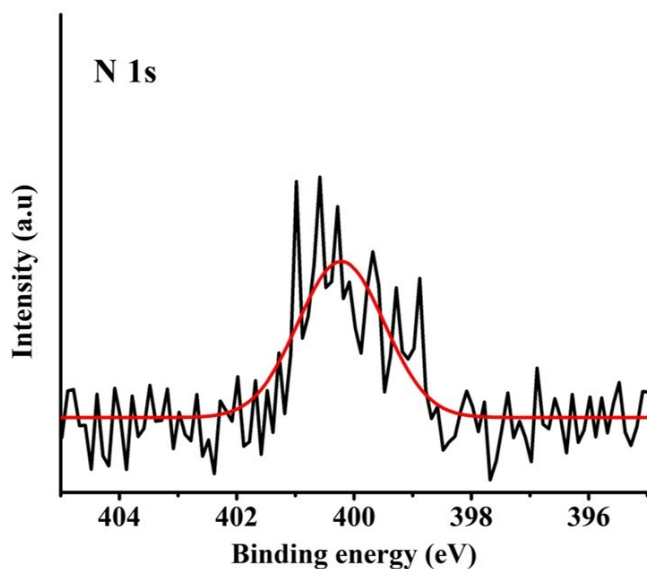

Figure S24. The high-resolution XPS spectra of N 1s in V-Co(OH)<sub>2</sub> after OER studies.

Table S2. Binding energy comparison of Co(OH)<sub>2</sub> and V, F doped catalysts.

| Catalyst                                          | Binding energy (eV) |                  | Intensity ratio (Co <sup>2+</sup> /Co <sup>3+</sup> ) | Binding energy (eV) |                 | Intensity ratio (V <sup>4+</sup> /V <sup>5+</sup> ) |
|---------------------------------------------------|---------------------|------------------|-------------------------------------------------------|---------------------|-----------------|-----------------------------------------------------|
|                                                   | Co <sup>2+</sup>    | Co <sup>3+</sup> |                                                       | V <sup>4+</sup>     | V <sup>5+</sup> |                                                     |
| Co(OH) <sub>2</sub>                               | 797.68              | 795.72           | 7.5>                                                  | -                   | -               | -                                                   |
|                                                   | 781.83              | 780.68           | 9.5>                                                  |                     |                 |                                                     |
| V-Co(OH) <sub>2</sub> -8                          | 798.15              | 795.72           | 3.2>                                                  | 516.75              | 517.85          | 1.8>                                                |
|                                                   | 782.13              | 780.2            | 1.4>                                                  |                     |                 |                                                     |
| V-Co(OH) <sub>2</sub> -10                         | 798.01              | 795.71           | 2.0>                                                  | 516.57              | 517.75          | 3.4>                                                |
|                                                   | 781.97              | 780.2            | 2.1>                                                  |                     |                 |                                                     |
| V-Co(OH) <sub>2</sub> -12                         | 798.3               | 796.5            | 2.9<                                                  | 516.38              | 517.29          | 1.5>                                                |
|                                                   | 782.6               | 780.7            | 1.2<                                                  |                     |                 |                                                     |
| V-Co(OH) <sub>2</sub> -2h                         | 798.06              | 795.66           | 8>                                                    | 516.12              | 517.87          | 5.0>                                                |
|                                                   | 782.32              | 780.15           | 4.9>                                                  |                     |                 |                                                     |
| V-Co(OH) <sub>2</sub> -4h                         | 798.04              | 796.3            | 2.4<                                                  | 516.17              | 517.16          | 3.1>                                                |
|                                                   | 781.6               | 780.2            | 1.3<                                                  |                     |                 |                                                     |
| V-Co(OH) <sub>2</sub> (without NH <sub>4</sub> F) | 798.02              | 796.4            | 2<                                                    | 516.62              | 517.94          | 3.0>                                                |
|                                                   | 781.71              | 779.86           | 1.3<                                                  |                     |                 |                                                     |
| V-Co(OH) <sub>2</sub> -NaF                        | 798.2               | 796.5            | 5.2<                                                  | 516.17              | 517.15          | 2.0>                                                |
|                                                   | 781.72              | 780.2            | 1.2<                                                  |                     |                 |                                                     |
| V-Co(OH) <sub>2</sub> -after OER                  | 797.72              | 796.14           | 1.8<                                                  | 516.5               | 517.36          | 1.3>                                                |
|                                                   | 781.67              | 780.37           | 1.3<                                                  |                     |                 |                                                     |

## References

- [1] L. Liardet, X. Hu, *ACS Catal.* **2018**, *8*, 644–650.
- [2] P. Li, X. Duan, Y. Kiang, Y. Li, G. Zhang, W. Liu, X. Sun, *Adv. Energy Mater.* **2018**, *8*, 1703341.
- [3] Y. Hu, Z. Wang, W. Liu, M. Guan, Y. Huang, Y. Zhao, J. Bao, H.-M. Li, *ACS Sus. Chem. Eng.* **2019**, *7*, 16828-16834.
- [4] L. Ma, K. Zhang, S. Wang, L. Gao, Y. Sun, Q. Liu, J. Guo, X. Zhang, *Appl. Surf. Sci.* **2019**, *489*, 815-823.
- [5] Y. Cui, Y. Xue, R. Zhang, J. Zhang, X. Li, X. Zhu, *J. Mater. Chem. A* **2019**, *7*, 21911-21917.
- [6] M. Yang, X. Fu, M. Shao, Z. Wang, L. Cao, S. Gu, M. Li, H. Cheng, Y. Li, H. Pan, Z. Lu, *ChemElectroChem*, **2019**, *6*, 2050-2055.
- [7] Y. Yang, Y. Ou, Y. Yang, X. Wei, D. Gao, L. Yang, Y. Xiong, H. Dong, P. Xiao, Y. Zhang, *Nanoscale* **2019**, *11*, 23296-23303.
- [8] R. Wei, X. Bu, W. Gao, R. A. B. Villaos, G. Macam, Z.-Q. Huang, C. Lan, F.-C. Chuang, Y. Qu, J. C. Ho, *ACS Appl. Mater. Interfaces* **2019**, *11*, 33012–33021.
- [9] H. Huang, Y. Li, W. Li, S. Chen, C. Wang, M. Cui, T. Ma, *Inorg. Chem. Commun.* **2019**, *103*, 1-5.
- [10] J. Guo, K. Zhang, Y. Sun, Q. Liu, L. Tang, X. Zhang, *Inorg. Chem. Front.*, **2019**, *6*, 443-450.
- [11] Y. Niu, W. Li, X. Wu, B. Feng, Y. Yu, W. Hu, C. M. Li, *J. Mater. Chem. A* **2019**, *7*, 10534-10542.
- [12] J.-F. Qin, J.-H. Lin, T.-S. Chen, D.-P. Liu, J.-Y. Xie, B.-Y. Guo, L. Wang, Y.-M. Chai, B. Dong, *J. Energy Chem.* **2019**, *39*, 182-187.
- [13] P. Li, M. Wang, X. Duan, L. Zheng, X. Cheng, Y. Zhang, Y. Kuang, Y. Li, Q. Ma, Z. Feng, W. Lu, X. Sun, *Nat. Commun.* **2019**, *10*, 1711.
- [14] S. Anantharaj, K. Karthick, P. Murugan, S. Kundu, *Inorg. Chem.* **2020**, *59*, 730-740.
- [15] H. Han, F. Yi, S. Choi, J. Kim, J. Kwon, K. Park, T. Song, *J. All. Comp.* **2020**, *846*, 156350.
- [16] J. Liang, H. Shen, Y. Ma, D. Liu, M. Li, J. Kong, Y. Tang, S. Ding, *Dalton Trans.* **2020**, *49*, 11217-11225.
- [17] Q. Liu, J. Huang, L. Cao, K. Kajiyoshi, K. Li, Y. Feng, C. Fu, L. Kou, L. Feng, *ACS Sustainable Chem. Eng.* **2020**, *8*, 6222–6233.
- [18] Y. Li, X. Jiang, Z. Miao, J. Tang, Q. Zheng, F. Xie, D. Lin, *ChemcatChem*, **2020**, *12*, 917-925.
- [19] Y. Zhu, D. Cao, N. Liu, D. Cheng, *Int. J. Hyd. Energy* **2021**, *46*, 22832-22841.
- [20] A. Mutharasu, A. P. Tiwari, K. Chhetri, B. Dahal, H. K. Kim, *Nano Energy* **2021**, *88*, 106238.
- [21] K. Bera, A. Karmakar, S. Kumaravel, S. S. Sankar, R. Madhu, H. N. Dhandapani, S. Nagappan, S. Kundu, *Inorg. Chem.* **2022**, *61*, 4502–4512.
- [22] X. Peng, C. Huang, J. Dai, Y. Liu, *Int. J. Hyd. Energy* **2022**, *47*, 4386-4393.
